# Supplementary material for: Plasma Proteome Profiles Associated with Inflammation, Angiogenesis, and Cancer
Source: PubMed Central journal article supplement (PMC3093388; doi:10.1371/journal.pone.0019721), 2011-05-12

Supplementary Figure 1A: Acute Inflammation

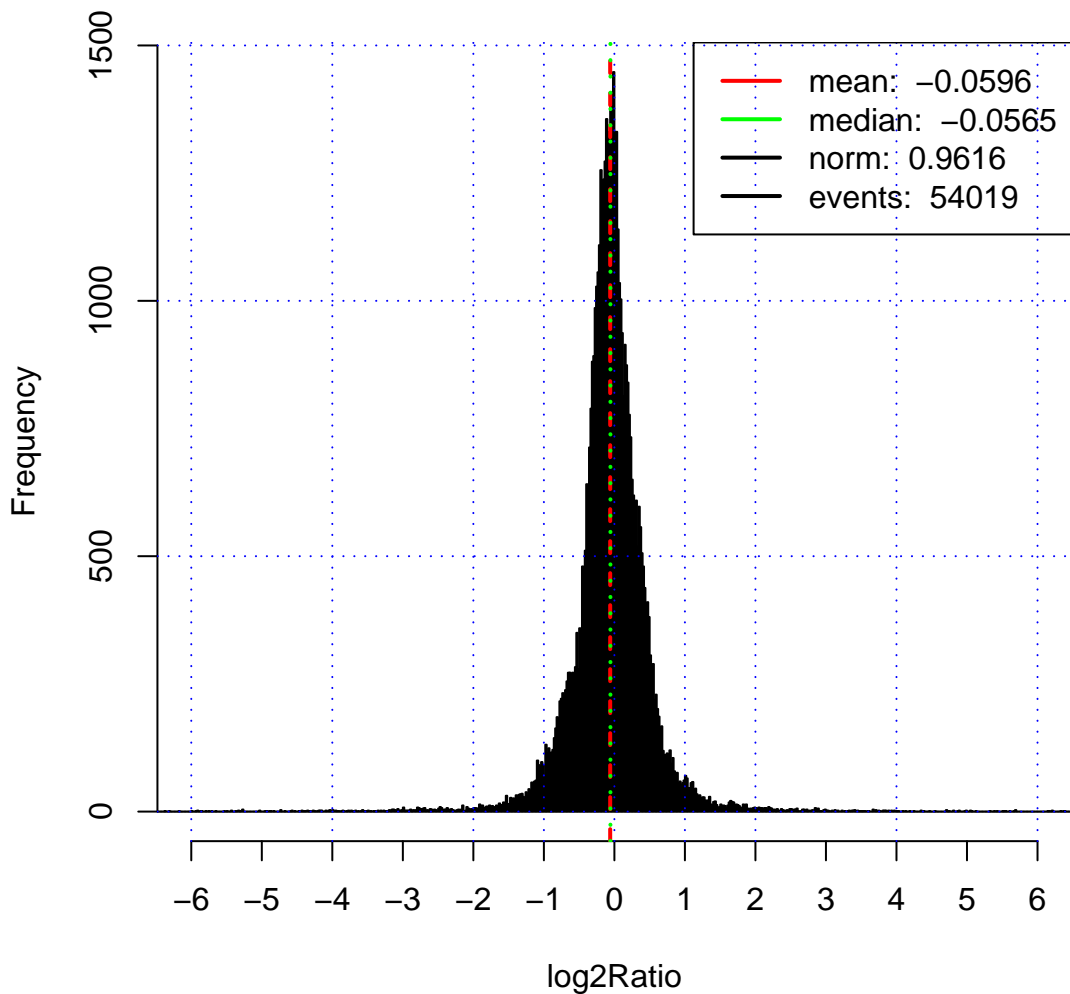

Supplementary Figure 1B: Chronic Inflammation

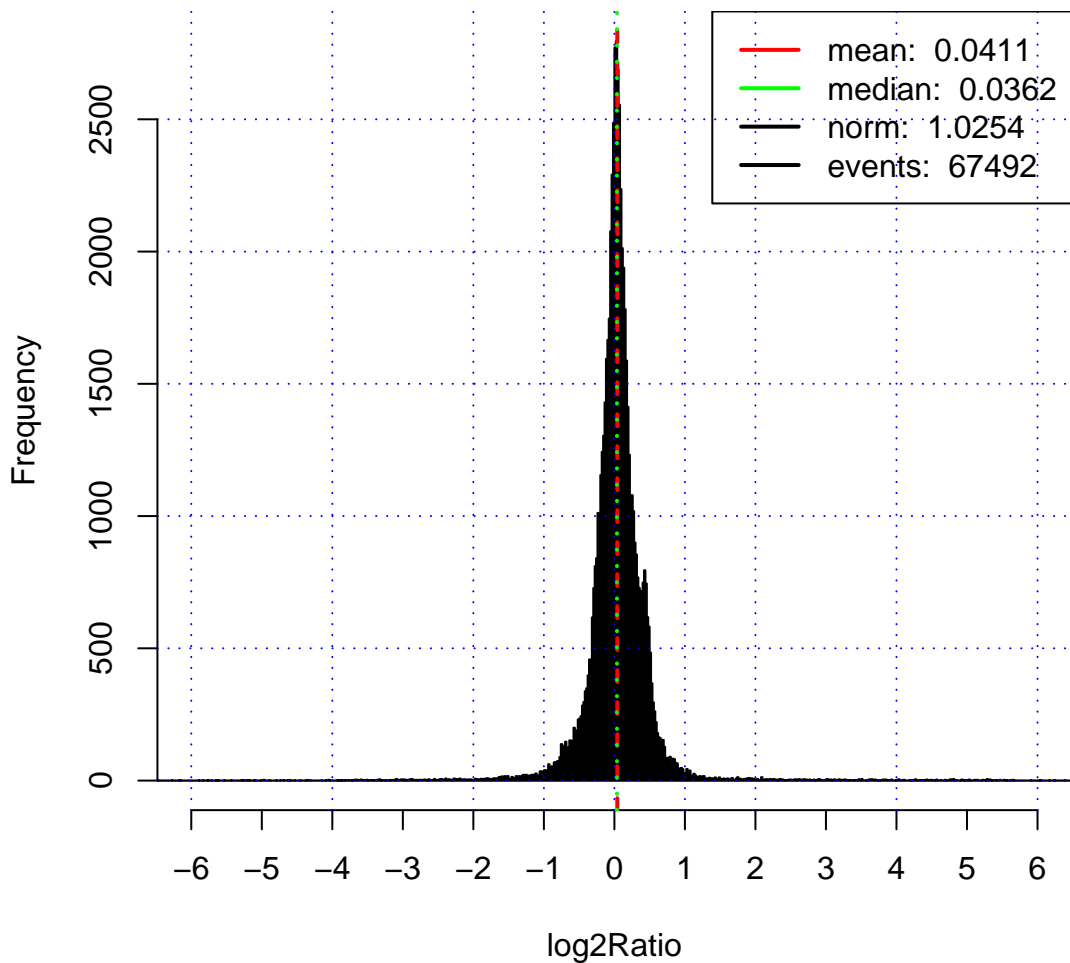

# Supplementary Figure 1C: Angiogenesis

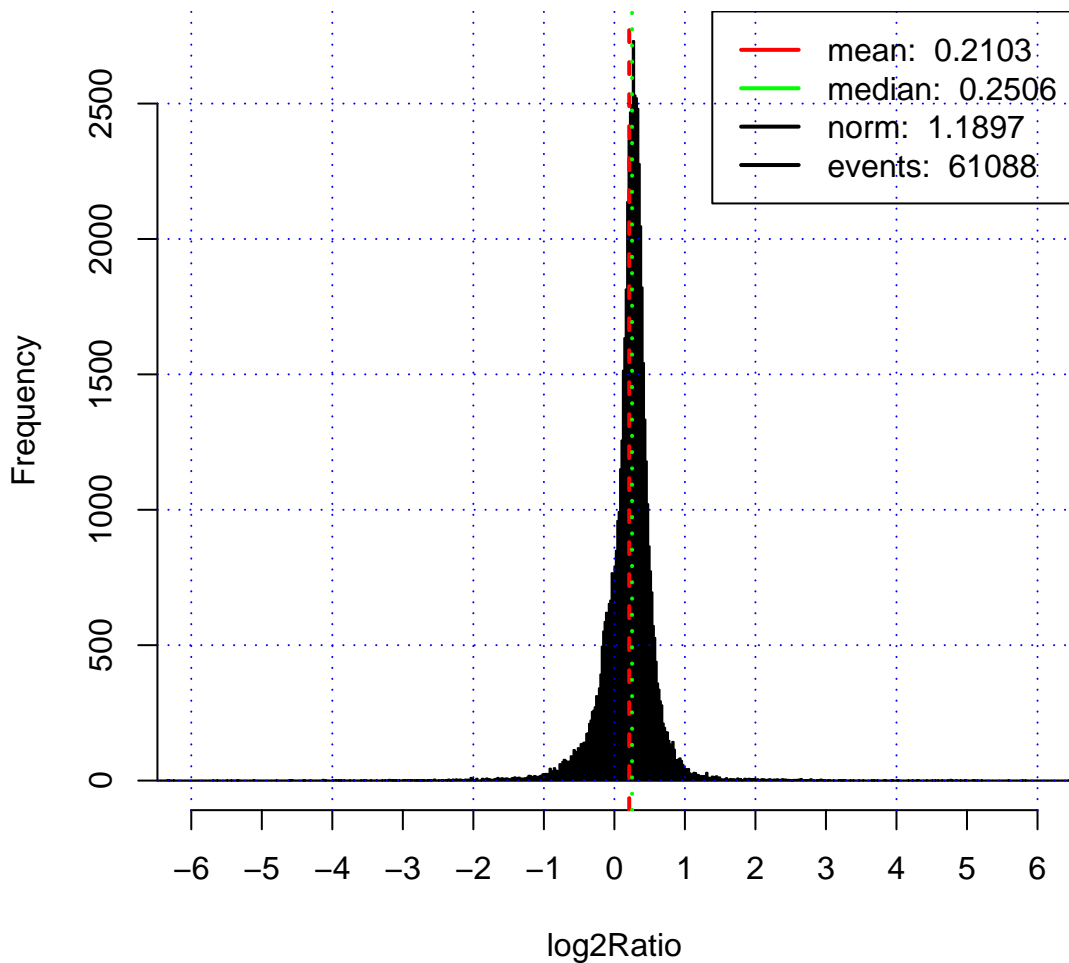

Supplement: pone.0019721.s001.pdf [file pone.0019721.s001.pdf]
